# Supplementary material for: Beyond and beneath displacement time series: towards InSAR-based early warnings and deformation analysis of the Achoma landslide, Peru
Source: Copernicus journal article supplement (doi:10.5194/egusphere-2025-1945), 2025-06-19
Supplement: Supplementary file 1 [file egusphere-2025-1945-supplement.pdf]

## Supplementary figures

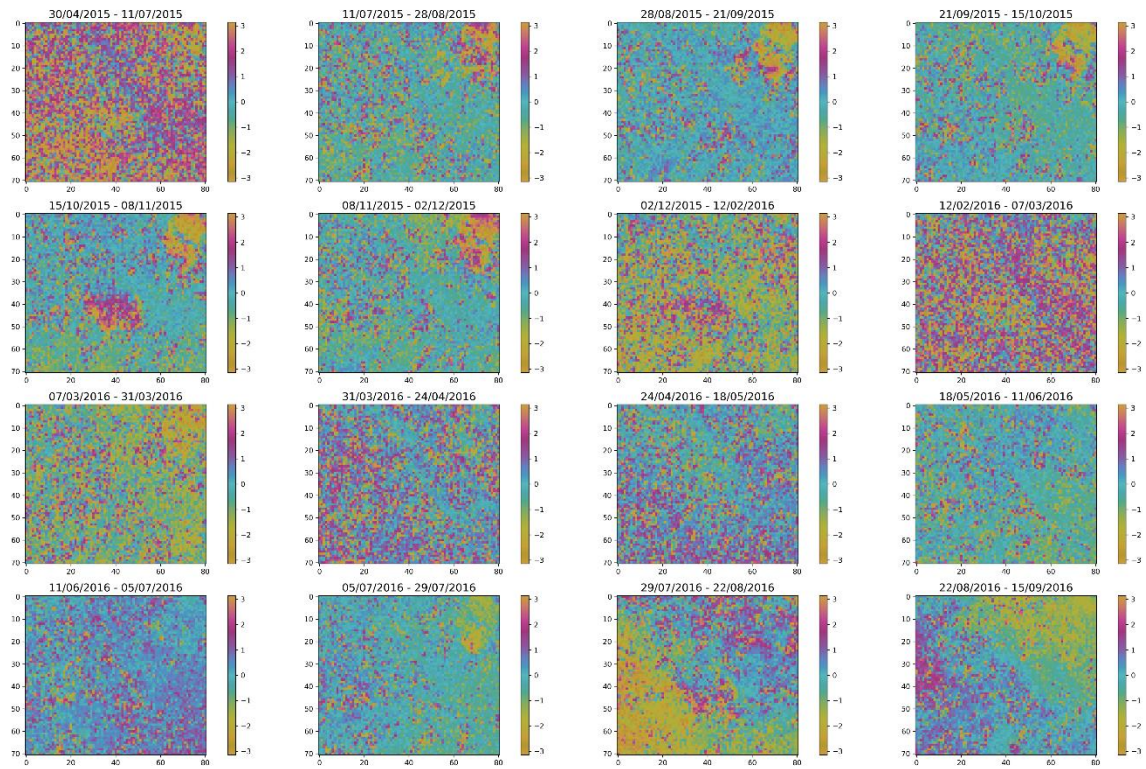

**Supplementary Figure 1.** Corrected wrapped interferograms from 30/04/2015 to 15/09/2016.

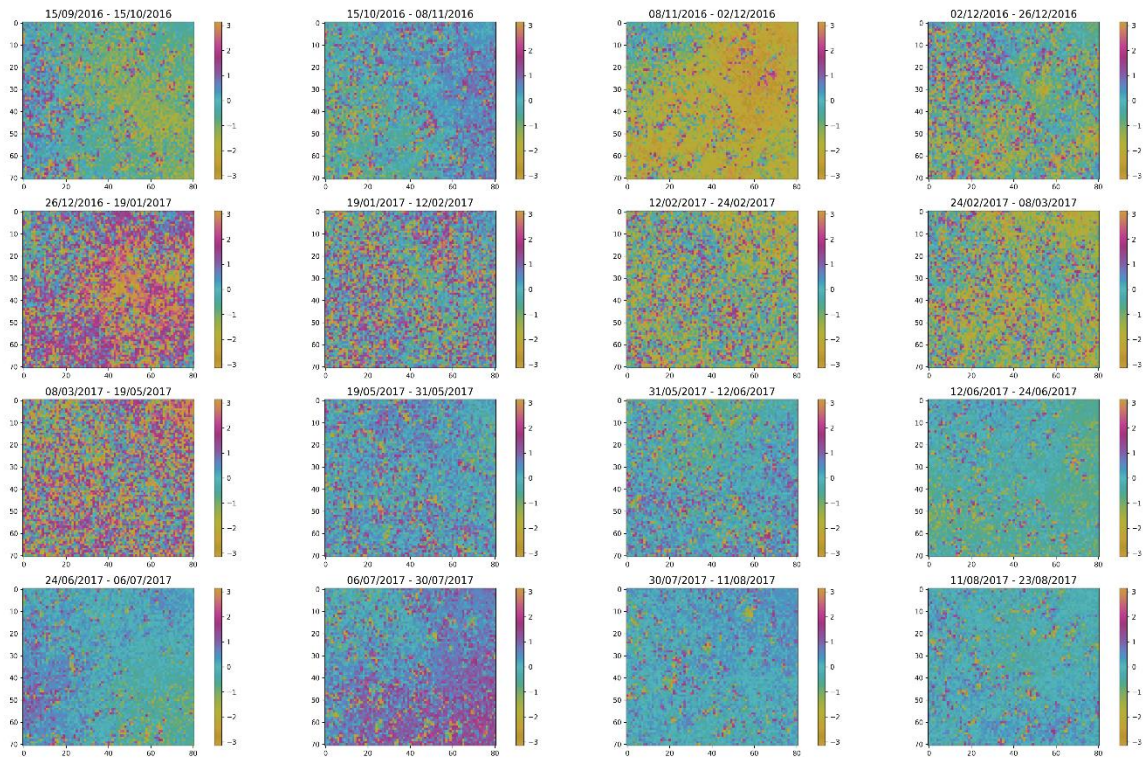

**Supplementary Figure 2.** Corrected wrapped interferograms from 15/09/2016 to 23/08/2017.



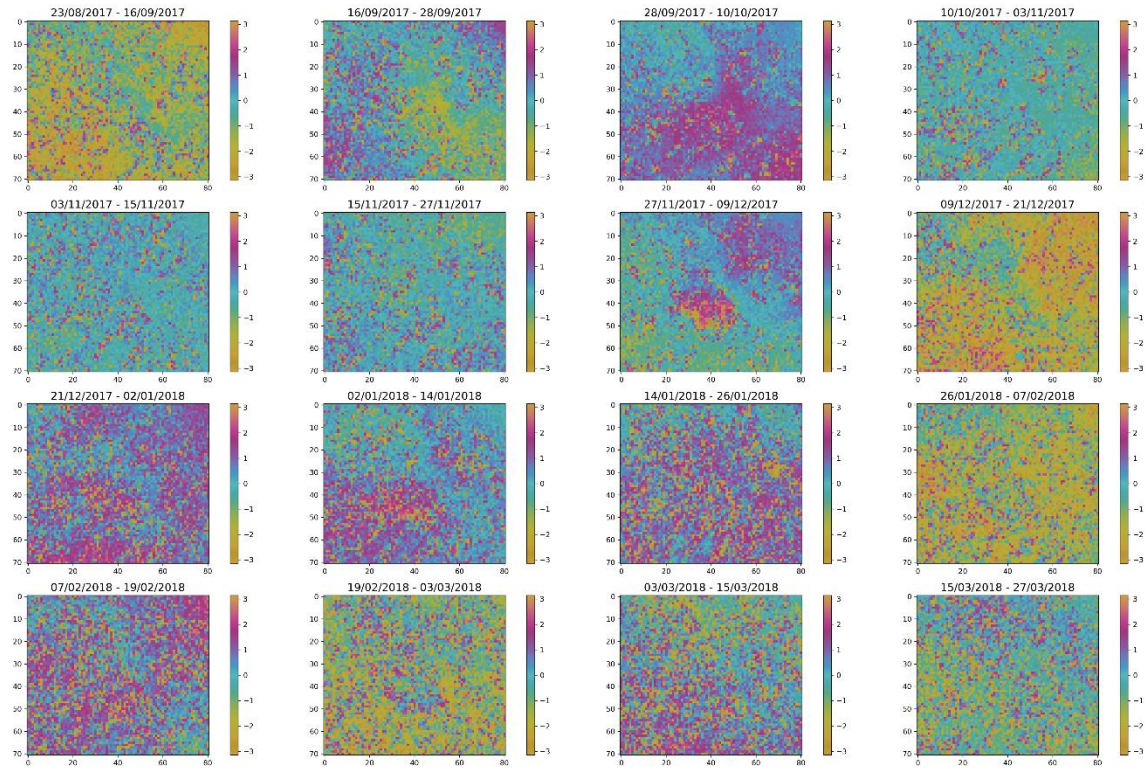

**Supplementary Figure 3.** Corrected wrapped interferograms from 23/08/2017 to 27/03/2018.

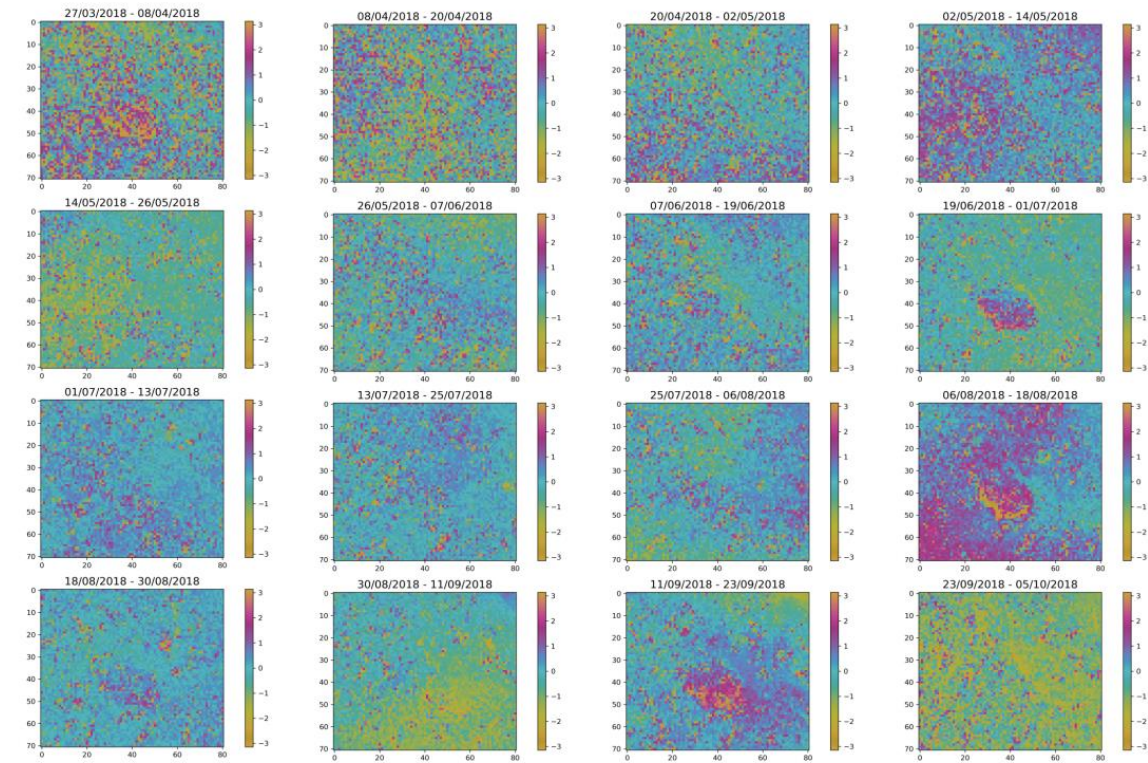

**Supplementary Figure 4.** Corrected wrapped interferograms from 27/03/2018 to 05/10/2018.



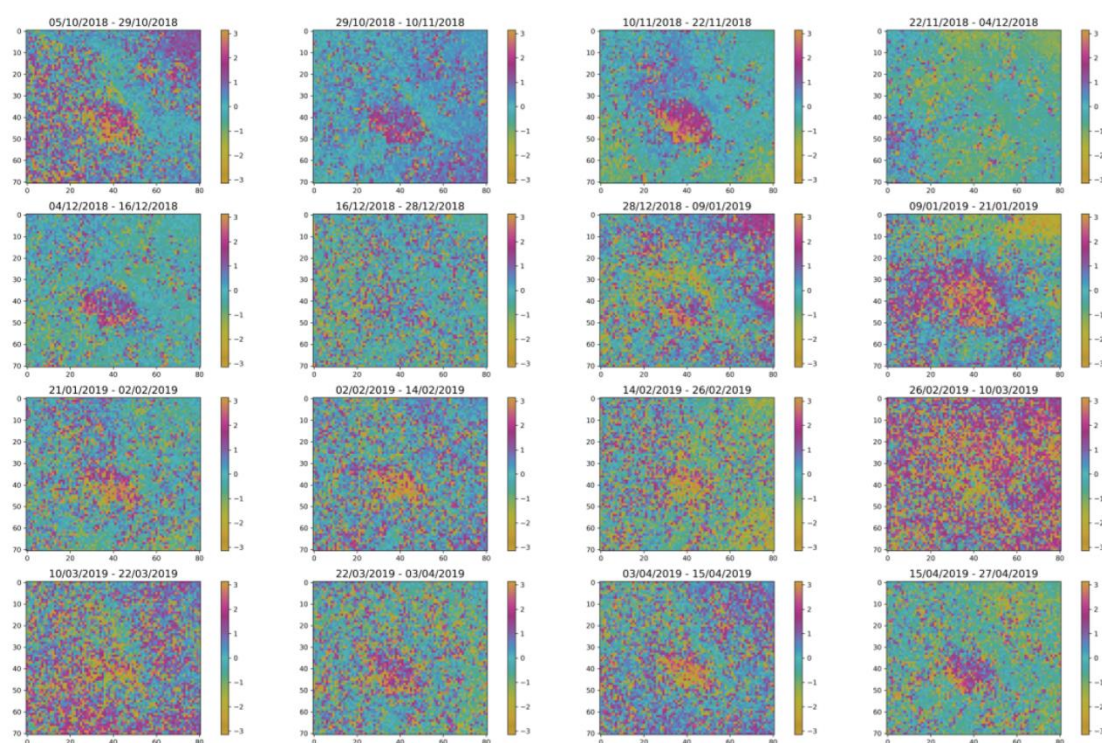

**Supplementary Figure 5.** Corrected wrapped interferograms from 05/10/2018 to 27/04/2019.

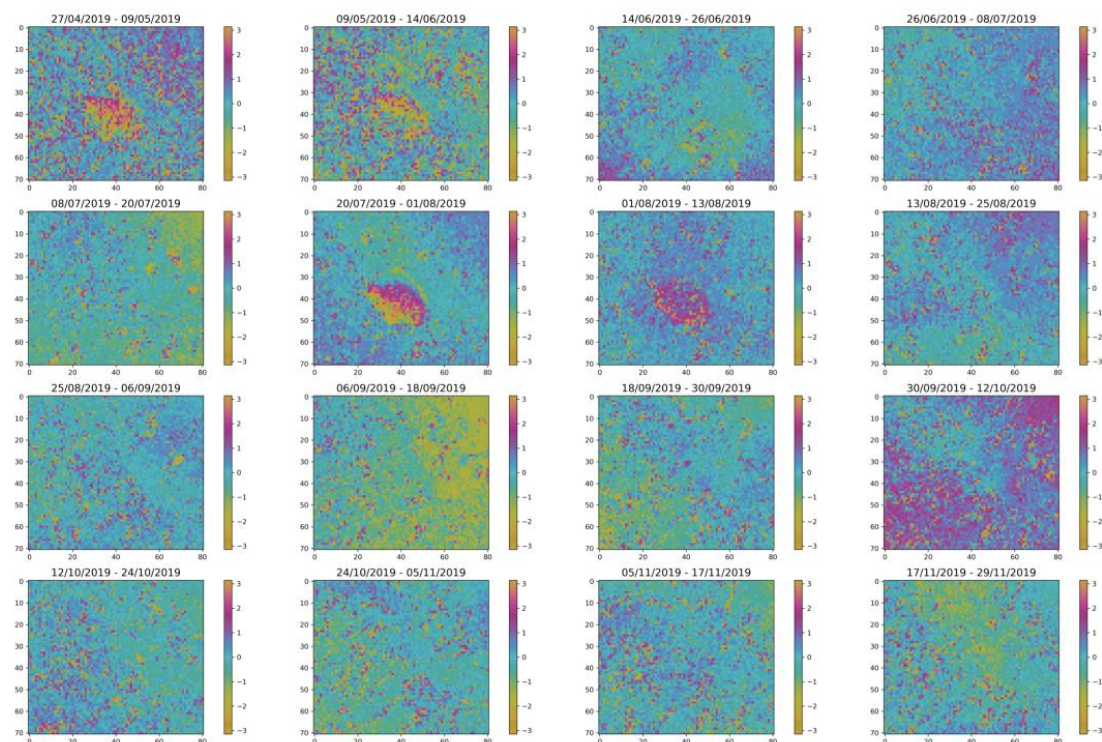

**Supplementary Figure 6.** Corrected wrapped interferograms from 27/04/2019 to 17/11/2019.



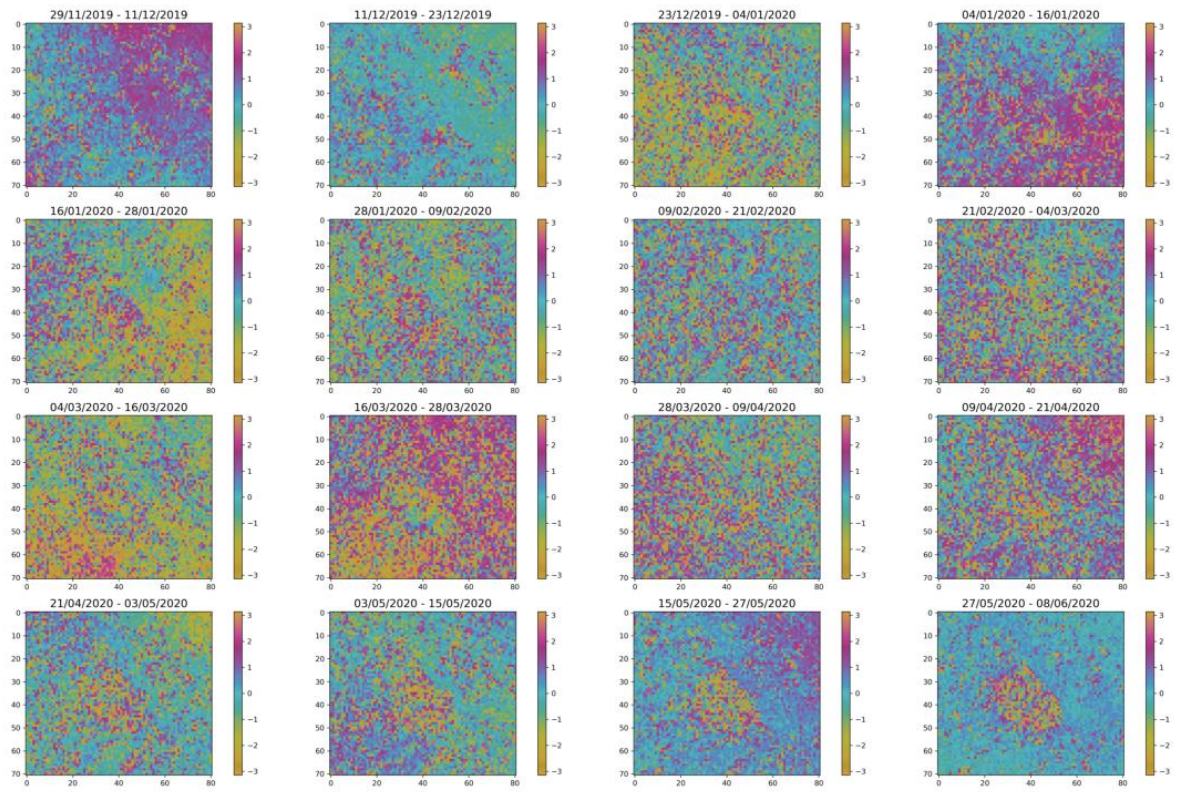

**Supplementary Figure 7.** Corrected wrapped interferograms from 29/11/2019 to 08/06/2020.

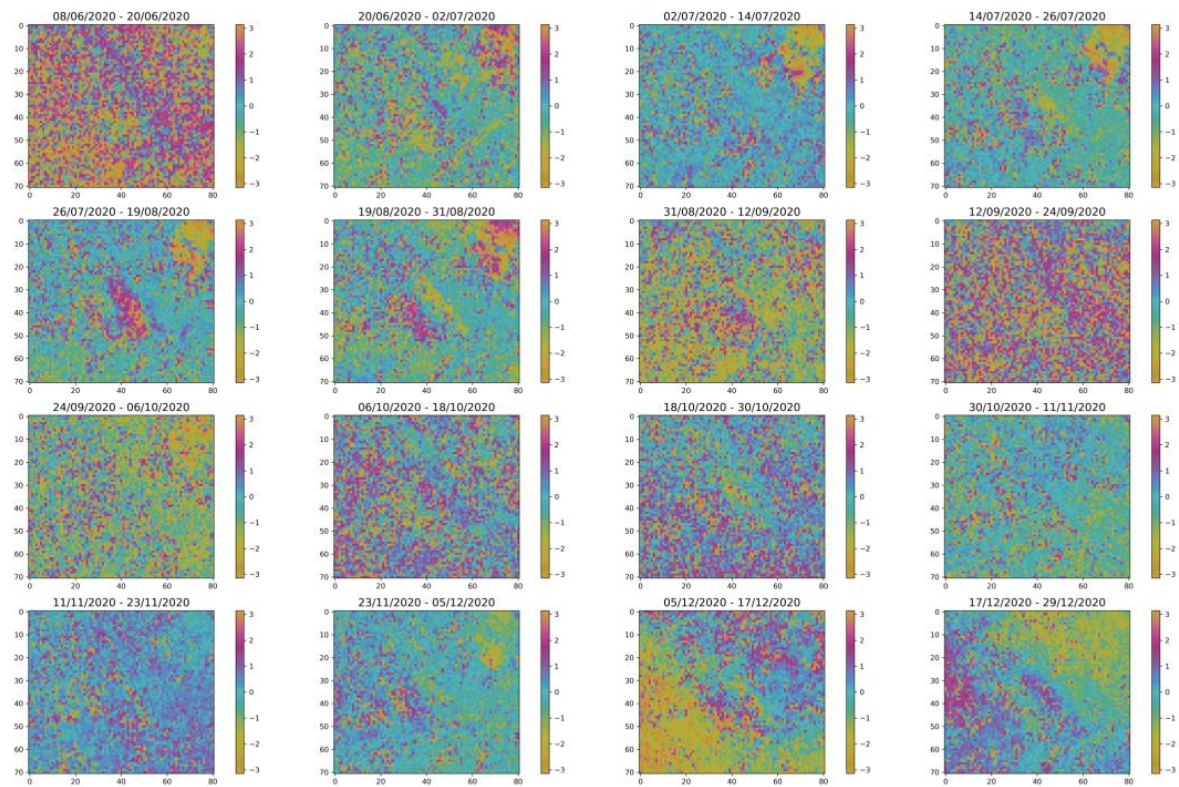

**Supplementary Figure 8.** Corrected wrapped interferograms from 08/06/2020 to 29/12/2020.

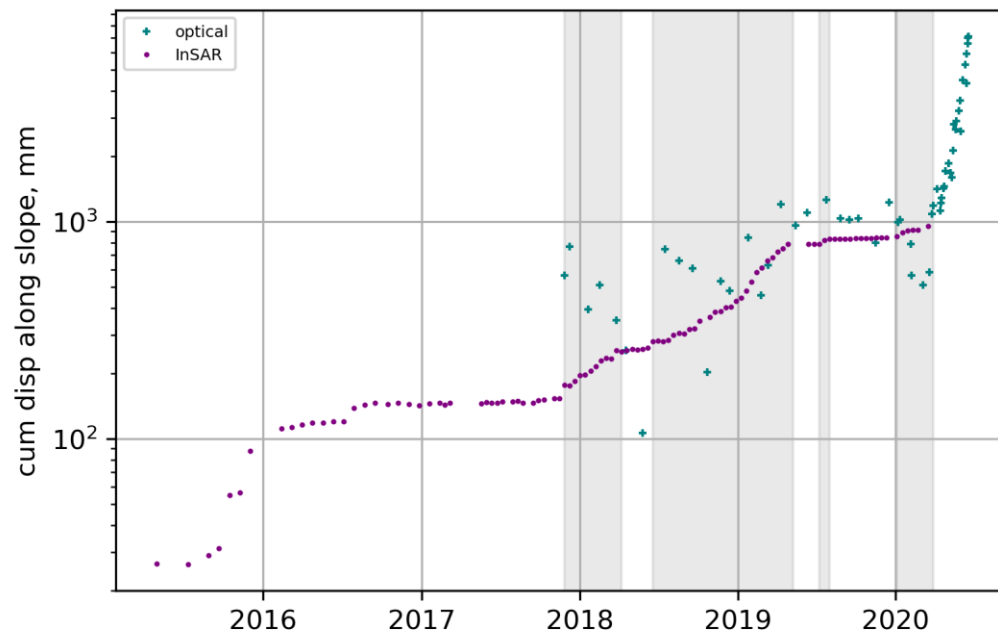

**Supplementary Figure 9.** Semilog plot of cumulative displacements on the Achoma landslide, showing the complementarity of InSAR and optical image correlation.
